# Supplementary material for: Transcriptome analysis and identification of P450 genes relevant to imidacloprid detoxification in Bradysia odoriphaga
Source: PubMed Central journal article supplement (PMC5803201; doi:10.1038/s41598-018-20981-2), 2018-02-07
Supplement: 41598_2018_20981_MOESM1_ESM.pdf [file 41598_2018_20981_MOESM1_ESM.pdf]

Transcriptome analysis and identification of P450 genes relevant to imidacloprid detoxification in *Bradysia odoriphaga*

Chengyu Chen<sup>1</sup>, Cuicui Wang<sup>1</sup>, Ying Liu<sup>1</sup>, Xueyan Shi<sup>1\*</sup>, Xiwu Gao<sup>1</sup>

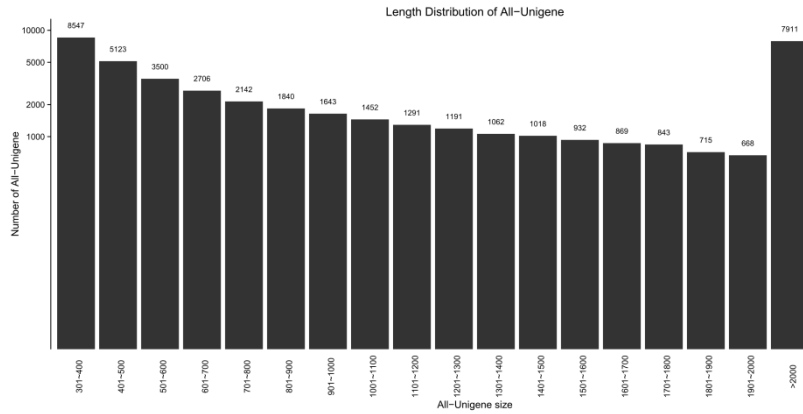

**Figure S1** Length distribution of *B. odoriphaga* unigenes. The x-axis indicates the length distribution of all unigenes and the y-axis indicates unigene number.

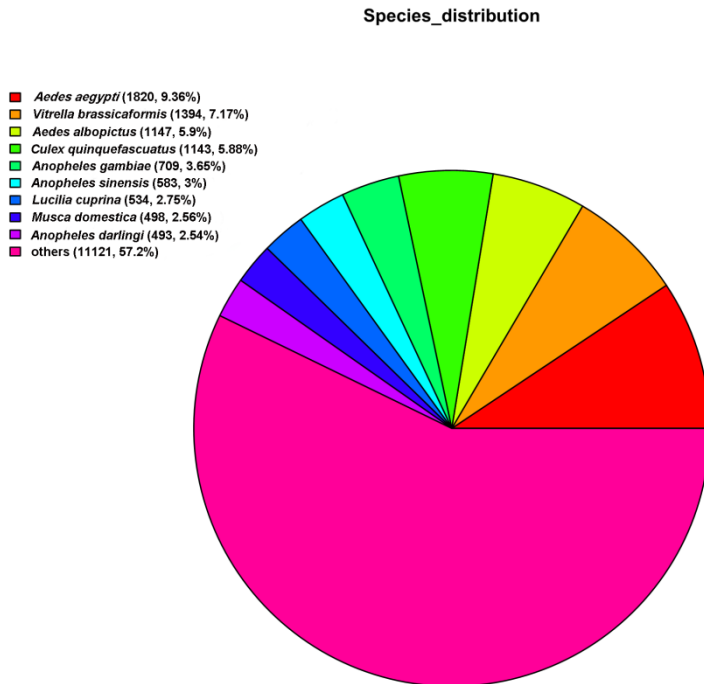

**Figure S2** Match result of non-redundant protein (NR) homologous species distribution. The number means the matched unigenes with the corresponding homologous species for all unigenes

of *Bradysia odoriphaga*.

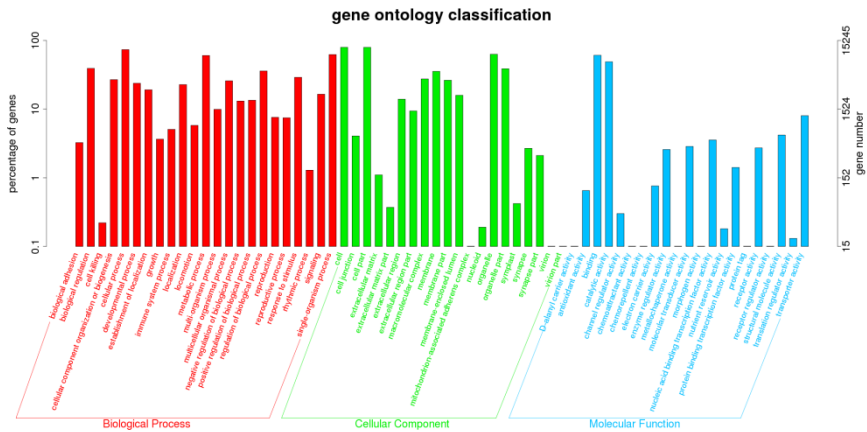

**Figure S3.** Number of *Bradysia odoriphaga* unigenes in each functional category. Unigenes were classified into different functional groups based on the Gene Ontology (GO) data library within the groups: biological process (red), cellular component (green), or molecular function (blue). The x-axis indicates the sub-categories and the y-axis indicates the percentage (left) and number (right) of all unigene.

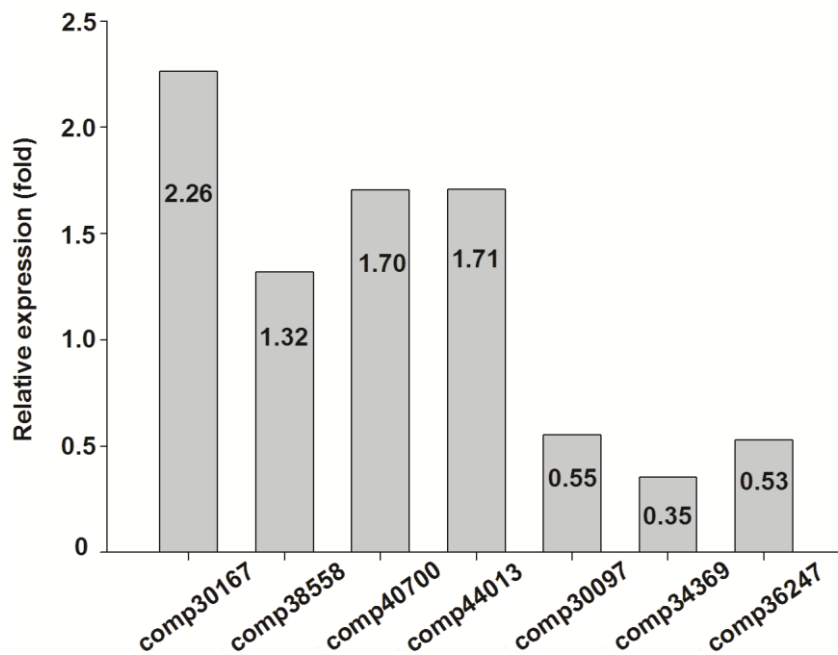

**Figure S4** DEG analysis of seven differentially expressed P450 transcripts used in our study. Numbers in each bar represent the fold change of 7 P450s unigenes, normalized to control, respectively.

**Table S1.** The specific primers used in qRT-PCR and RNAi

| Unigene ID | Up-down | Primer used | Primers sequence (5'-3')                                                                  |
|------------|---------|-------------|-------------------------------------------------------------------------------------------|
| comp30167  | up      | qRT-PCR     | F-GCCACACTCAGTCCAACATTC<br>R-GACATCGTTTCGTATAGCGTG                                        |
|            |         | RNAi        | F-taatacgactcactatagggACATTTGTCGGAAAAGGCTG<br>R- taatacgactcactatagggTGCCAGCAATTCATTGTCAT |
| comp38558  | up      | qRT-PCR     | F-GGCGTGATATGAGAGCTACCC<br>R-GCCGCTGACGAAATGACATC                                         |
|            |         | RNAi        | F-taatacgactcactatagggGCGGCTTTTGGTTACAACAT<br>R-taatacgactcactatagggCGTTCCTGAATGTCAGGGTT  |
| comp40700  | up      | qRT-PCR     | F-GCCGTTAACGTTCTACCAGC<br>R-CCAATAATCGGTGCAAATCG                                          |
|            |         | RNAi        | F-taatacgactcactatagggTACGCGATTGGGTTGTGTAA<br>R-taatacgactcactatagggCTCTCAGAAACGGCATCCTC  |
| comp44013  | up      | qRT-PCR     | F-CATTTCGTCGCACTACTCCTC<br>R-GCCAATGGGAACGAGCGAAC                                         |
|            |         | RNAi        | F-taatacgactcactatagggCGAGCAATAGATCGGGACAT<br>R-taatacgactcactatagggGGTGACACATTTTGCACCTG  |
| comp30097  | down    | qRT-PCR     | F- GAGTCGAGGATGAAGTCTC<br>R-GTTAGTGATGGTAAGAATC                                           |
| comp34369  | down    | qRT-PCR     | F- TGTGCTCTCCGATCTATC<br>R-GTAGAAGGCGTAAGCTATG                                            |
| comp36247  | down    | qRT-PCR     | F- CTGAGATTGTTCCGAATGAC<br>R-CAGCCACCGAATAAATGGGAC                                        |
| 18s        |         | qRT-PCR     | F- CTAACCATAAACGATGCCAG<br>R- ACTCCACGAAC TAAGAACGG                                       |
